# Supplementary material
Source: publisher figshare collection journal article supplement (https://sage.figshare.com/ndownloader/files/14243804)
Supplement: Supplementary file 1 [file 14243804]

**Supplement 1: Standard email to labs, sent on 2/7/17**

Hello,

My name is Katie Angione, I am a genetic counselor at Children's Hospital Colorado. I am currently conducting a review of available epilepsy genetic testing. I did an initial review of this testing several months ago, but I am hoping to obtain up to date information as this can change quite rapidly. For your \*\*\* panel, I would like to know the following, if available:

- minimum depth of coverage
- average depth of coverage
- list price
- VUS rate
- Is Sanger confirmation performed for identified variants?
- Is free parental testing offered when a VUS is identified?
- Is deletion/duplication analysis performed for all genes on the panel?

Thank you so much for your time,

Katie Angione, MS CGC
